# Supplementary material for: Study on the room temperature synthesis of highly photoluminescent and temperature-sensitive CDs/PNIPAM hybrid hydrogels and their properties
Source: Royal Society of Chemistry journal article supplement (doi:10.1039/c5ra11217f), 2015-01-01
Supplement: c5ra11217f1.pdf [file c5ra11217f1.pdf]

supplementary information

**Study on the room temperature synthesis of highly  
photoluminescent and temperature-sensitive CDs/PNIPAM hybrid  
hydrogels and their properties**

Ye-Yun Zhang, Xi-Wen He, Wen-You Li\*

*College of Chemistry, Research Center for Analytical Sciences, State Key Laboratory of Medicinal  
Chemical Biology (Nankai University), Tianjin Key Laboratory of Molecular Recognition and Biosensing,  
Collaborative Innovation Center of Chemical Science and Engineering (Tianjin), Nankai University, 94  
Weijin Road, Tianjin 300071, China.*

**1. Preparation of fluorescent CDs**

0.125 g of lactose and 2.0 g of Tris were dissolved in 40 mL pure water and it was hydrothermally refluxed at 100 °C with stirring for 24 h. The solution turned from colourless into yellow. After cooled down to room temperature, the solution was dialyzed (MW 1000) against water for 2 days and frozen drying to obtain drying sample. Before synthesis CDs/PNIPAM gel, the drying CDs were resolved in pure water at an appropriate concentration about 30 mg/mL.

**2. Time dependent photographs of the CDs/PNIPAM gel**

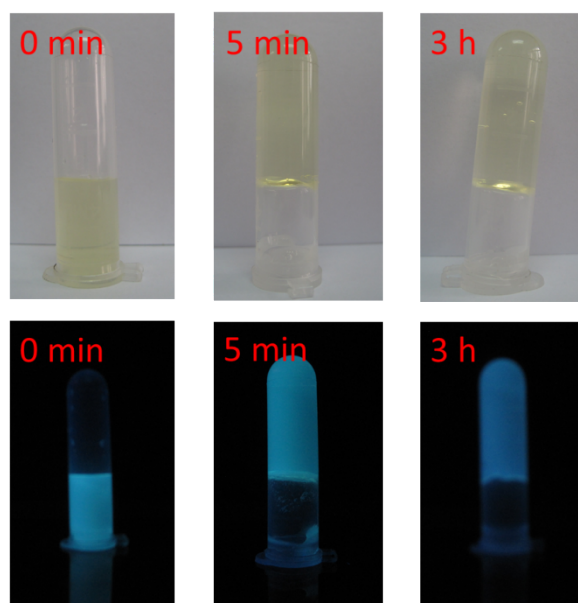

**Fig. S1** Time dependent photographs of the CDs/PNIPAM gel under sunlight (up) and under a 365 UV lamp (down)

**3. The affection of NaCl on the fluorescent intensity of CDs/PNIPAM gel**

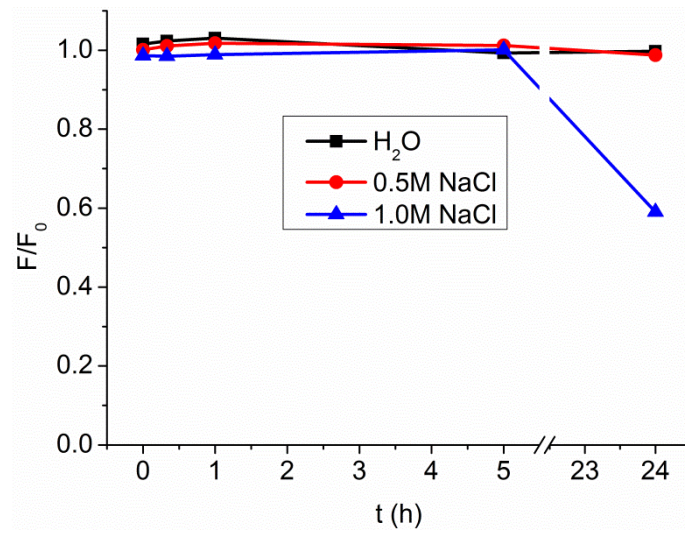

**Fig. S2** The influence of NaCl on the fluorescent intensity of CDs/PNIPAM gel
